# Supplementary material
Source: MDPI journal article supplement (https://www.mdpi.com/2073-445X/12/7/1426)

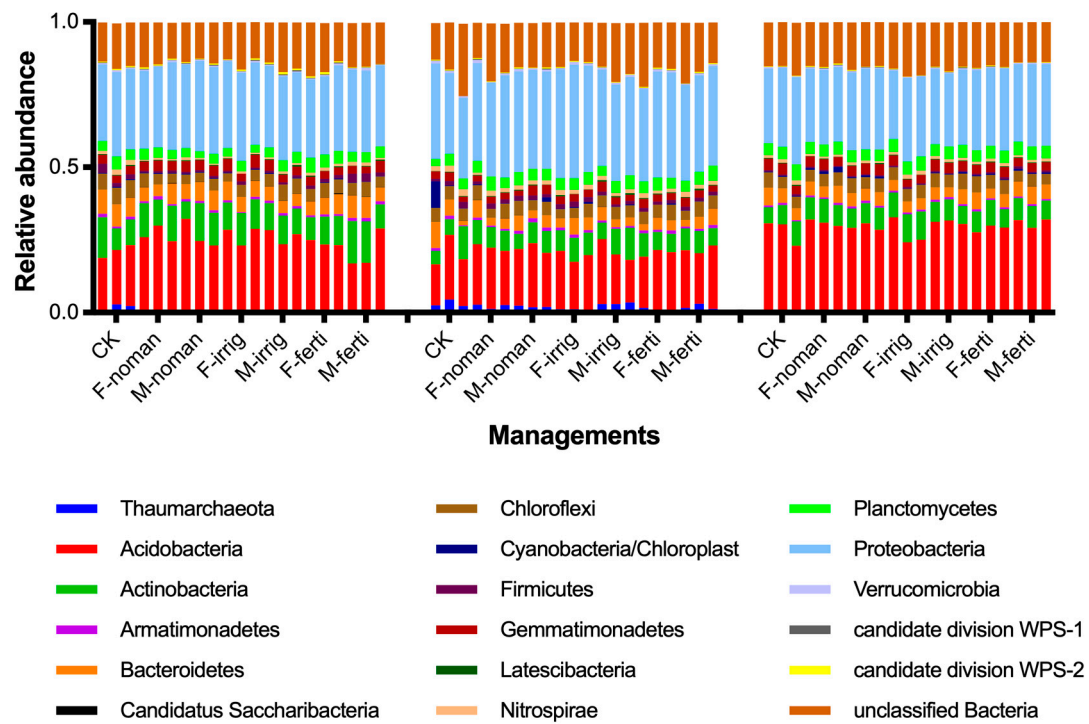

**Figure S1.** Relative abundance of bacteria at the phylum level.

Supplement: s1 [file s1]
